# Supplementary material
Source: publisher site journal article supplement (https://edge.sagepub.com/sites/default/files/Wisner%20Chapter%20Outline%2013%20Supplement.docx)
Supplement: Supplementary file 1 [file Wisner%20Chapter%20Outline%2013%20Supplement.docx]

Chapter Outline

# Chapter 13 Supplement: Statistical Quality Control

***See pages 413-435.***

Introduction

Process Variations

Measurement Variations

Data Samples

Process Control for Variable Data

Constructing the x– chart and the R chart

Process Control for Attribute Data

Using and Constructing P Charts

Using C Charts

Process Capability

Process Capability Index

Acceptance Sampling

Sampling Plan

Sampling Risk

Use of Operating Characteristics Curves
